# Supplementary material for: Influence of Axial Load and a 45-Degree Flexion Head Position on Cervical Spinal Stiffness in Healthy Young Adults
Source: Frontiers journal article supplement (doi:10.3389/fphys.2021.786625), 2021-12-23

## Supplementary File 1

Figure S1. Interaction plot between head position and Loading condition

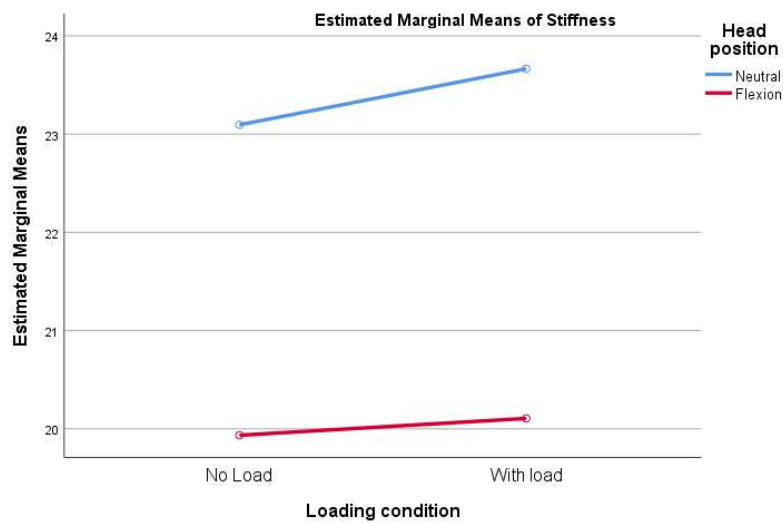

Figure S2 Interaction plot between head position and measurement location

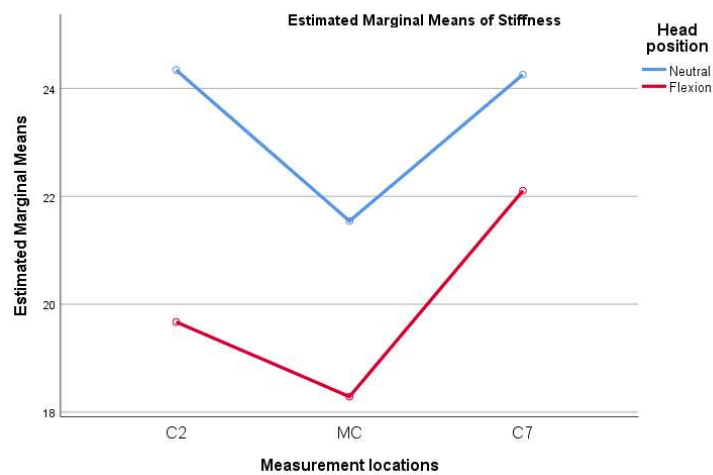

Figure S3 Interaction plot between loading condition and measurement location

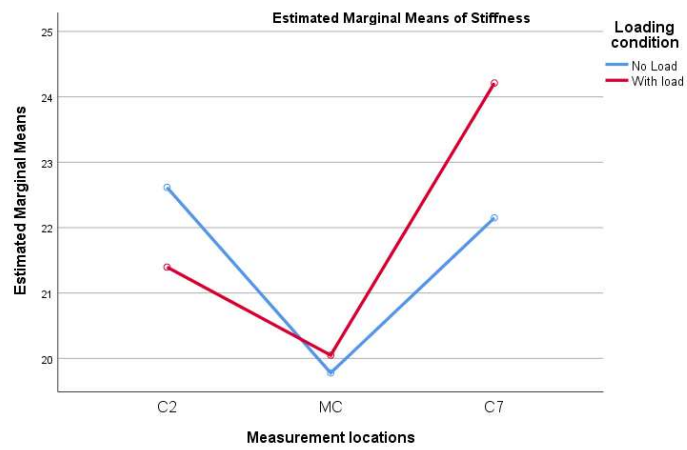

Supplement: Data_Sheet_1.PDF [file Data_Sheet_1.PDF]
